# Supplementary material for: First Dye-Decolorizing Peroxidase from an Ascomycetous Fungus Secreted by Xylaria grammica
Source: MDPI journal article supplement (doi:10.3390/biom11091391), 2021-09-21
Supplement: s1 [file s1]

## Supplementary Material

### S1 *Proteomics (Peptide mapping)*

Each sample was prepared for proteolytic cleavage before mass spectrometric analysis. Protein lysate was reduced (2.5 mM DTT for 1 h at 60 °C) and alkylated (10 mM iodoacetamide for 30 min at 37 °C). Proteolysis was performed overnight using trypsin (Promega, Madison, WI, USA) with an enzyme/substrate ratio of 1:25 overnight at 37 °C by trypsin (Promega). Extracted peptide lysate was desalted using a C<sub>18</sub> ZipTip column (Merck Millipore).

Peptide lysates were dissolved in 0.1 % formic acid and injected into liquid chromatography mass spectrometry (LC-MS/MS) apparatus. Mass spectrometry was performed on a Q Exactive HF MS (Thermo Fisher Scientific, Waltham, MA, USA) with a TriVersa NanoMate (Advion, Ltd., Harlow, UK) source in LC chip coupling mode. First, the peptide lysates were separated on a UHPLC system (Ultimate 3000, Dionex/Thermo Fisher Scientific, Idstein, Germany). In total, 5 µL samples were first loaded for 5 min on the precolumn (µ-precursor, Acclaim PepMap, 75 µm inner diameter, 2 cm, C<sub>18</sub>, Thermo Scientific) at 4 % mobile phase B (80 % acetonitrile in nanopure water with 0.08 % formic acid), 96 % mobile phase A (nanopure water with 0.1 % formic acid), then eluted from the analytical column (PepMap Acclaim C<sub>18</sub> LC Column, 25 cm, 3 µm particle size, Thermo Scientific) over a 90 min non-linear gradient of mobile phase B (4-55 % B).

The mass spectrometer was set on loop count of 20 used for MS/MS scans with higher energy collision dissociation (HCD) at normalized collision energy of 30 %. MS scans were measured at a resolution of 120,000 in the scan range of 350-1,550 *m/z*. MS ion count target was set to 3×10<sup>6</sup> at an injection time of 80 ms. Ions for MS/MS scans were isolated in the quadrupole with an isolation window of 1.6 Da and were measured with a resolution of 15,000 in the scan range of 200-2,000 *m/z*. The dynamic exclusion duration was set to 30 s with a 10 ppm tolerance. Automatic gain control target was set to 2×10<sup>5</sup> with an injection time of 120 ms using the underfill ratio of 1 %.

The software Proteome Discoverer (v1.4, Thermo Scientific) was used for protein identification. Therefore, the measured MS/MS spectra (\*.raw files) were searched with the Sequest HT algorithm first against the Uniprot (bacteria and archaea database). The following settings were selected for both searches: enzyme specificity was trypsin with up to two missed cleavages allowed using 10 ppm peptide ion tolerance and 0.02 Da MS/MS tolerances. Oxidation (methionine) and acetylation (any N-terminus) were selected as a dynamic modification and carbamidomethylation (cysteine) as a static modification. Only peptides with a false discovery rate (FDR) <0.01 calculated by Percolator, peptide rank =1 and XCorr >2 were considered as identified.

**Table S1.** Summary of the properties of the three genes encoding DyPs, which were identified in the *X. grammica* genome (bold letters indicate the gene belonging to the purified *XgrDyP*).

| Gene       | ORF          | Introns  | Protein    | Mw (kDa)    | pI          | Signal peptide | Glycosylation sites |
|------------|--------------|----------|------------|-------------|-------------|----------------|---------------------|
| <b>488</b> | <b>1,888</b> | <b>6</b> | <b>493</b> | <b>53.9</b> | <b>6.45</b> | -              | <b>2</b>            |
| 1956       | 3,642        | 1        | 1,196      | 133.0       | 5.16        | -              | 2                   |
| 9177       | 1,095        | 0        | 364        | 40.4        | 6.73        | -              | 3                   |

**Table S2.** Kinetic constants ( $K_M$  ( $\mu\text{M}$ ),  $k_{cat}$  ( $\text{s}^{-1}$ ) and  $k_{cat}/K_M$  ( $\text{s}^{-1} \text{mM}^{-1}$ ) for the oxidation of ABTS, 2,6-DMP, RBlue 5 and  $\text{Mn}^{2+}$  by basidiomyceteous wild-type and recombinant DyPs of *A. auricula judae* (AauDyP1 & 2), *Pleurotus sapidus* (rPsaDyP) and *P. ostreatus* (rPosDyP1 & 4) in comparison to recombinant bacterial DyPs from *P. fluorescens* (rPflDyP1B & rPflDyP2B) and *R. jostii* (rRjoDyPA) as well as to wild-type ligninolytic MnPs (PosMnP3 & 6) & VPs (PosVP1 & 2) of *P. ostreatus*; references are given in parentheses.

| Substrate        |               | AauDyP1<br>[1] | AauDyP2<br>[1] | rPsaDyP<br>[2] | rPosDyP1<br>[3] | rPosDyP4<br>[3] | rPflDyP1B<br>[4] | rPflDyP2B<br>[4] | rRjoDyPA<br>[5] | PosMnP3<br>[3] | PosMnP6<br>[3] | PosVP1<br>[3] | PosVP2<br>[3] |
|------------------|---------------|----------------|----------------|----------------|-----------------|-----------------|------------------|------------------|-----------------|----------------|----------------|---------------|---------------|
| ABTS             | $K_M$         | 18             | 20             | 99             | 779             | 787             | 1,130            | 1,700            | 8,200           | 778            | 1,020          | 4             | 495           |
|                  | $k_{cat}$     | 292            | 509            | 375            | 208             | 277             | 13.5             | 10.2             | 17              | 222            | 115            | 14            | 12            |
|                  | $k_{cat}/K_M$ | 16,222         | 25,450         | 3,788          | 267             | 352             | 11.9             | 6                | 2               | 285            | 112            | 3,600         | 9             |
| 2,6-DMP          | $K_M$         | 27             | 23             | 1,227          | 31,100          | 126             |                  |                  |                 | 59,100         | 117,000        | 54            | 607           |
|                  | $k_{cat}$     | 90             | 100            | 60             | 64              | 268             |                  |                  |                 | 101            | 56             | 7             | 17            |
|                  | $k_{cat}/K_M$ | 3,333          | 4,348          | 50             | 2.1             | 2,120           |                  |                  |                 | 1.7            | 0.5            | 122           | 28            |
| RBlue5           | $K_M$         | -              | -              | 24             | -               | 5.7             |                  |                  |                 | -              | -              | 5.4           | 9.6           |
|                  | $k_{cat}$     | -              | -              | 18             | 0               | 5.3             |                  |                  |                 | 0              | 0              | 12.9          | 20.3          |
|                  | $k_{cat}/K_M$ | -              | -              | 750            | 0               | 1,080           |                  |                  |                 | 0              | 0              | 2,380         | 2,120         |
| $\text{Mn}^{2+}$ | $K_M$         | -              | -              |                | 2,780           | 286             | 7,300            | 1,700            | 24,000          | 101            | 73             | 98            | 18            |
|                  | $k_{cat}$     | -              | -              |                | 10              | 56              | 2.4              | 3.6              | 0.6             | 163            | 109            | 185           | 79            |
|                  | $k_{cat}/K_M$ | -              | -              |                | 4               | 196             | 0.33             | 2.1              | 0.02            | 1,010          | 1,500          | 1,900         | 4,510         |

1. Bobeth, C.: Produktion, Reinigung und Charakterisierung einer extrazellulären Peroxidase des Weissfäulepilzes *Auricularia auricula-judae* (Judasohr). Bachelor Thesis, International Institute Zittau, Germany, 13.10.2008
2. Fernández-Fueyo, E.; Linde, D.; Almendral, D.; López-Lucendo, M.F.; Ruiz-Dueñas, F.J.; Martínez, A.T. Description of the first fungal dye-decolorizing peroxidase oxidizing manganese(II). *Appl Microbiol Biotechnol* **2015**, 99, 8927-8942.

3. Lauber, C., Schwarz, T., Nguyen, Q.K., Lorenz, P., Lochnit, G., Zorn, H. Identification, heterologous expression and characterization of a dye-decolorizing peroxidase of *Pleurotus sapidus*. *AMB Expr* **7**, 164, <https://doi.org/10.1186/s13568-017-0463-5>
4. Rahmanpour, R.; Bugg, T.D.H. Characterisation of DyP-type peroxidases from *Pseudomonas fluorescens* Pf-5: Oxidation of Mn(II) and polymeric lignin by Dyp1B. *Arch Biochem Biophys* **2015**, *574*, 93-98.
5. Roberts, J.N.; Singh, R.; Grigg, J.C.; Murphy, M.E.; Bugg, T.D.; Eltis, L.D. Characterization of dye-decolorizing peroxidases from *Rhodococcus jostii* RHA1. *Biochemistry* **2011**, *50*, 5108-5119.

**Figure S1.** Protein sequence of the *X. grammica* DyP encoded by the gene *g488*; grey highlighted parts are internal *de-novo* peptide sequences of the purified protein identified by mass spectrometry.

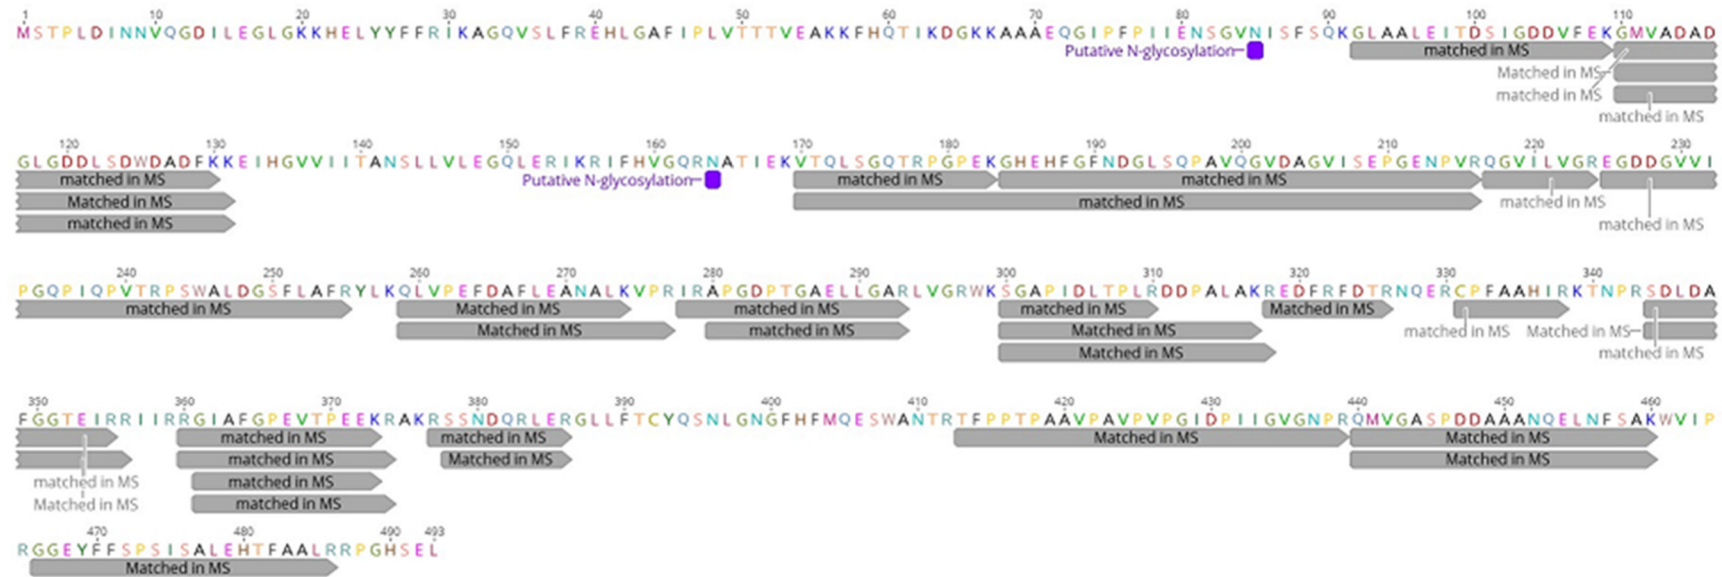



**Figure S3.** Conserved residues of the heme binding site of three *X. grammica* DyPs in comparison to other bacterial and fungal DyP-type peroxidases.

| Consensus                              | 310                  | 320 |
|----------------------------------------|----------------------|-----|
| Identity                               | DGRXLFG-FVDGTXNP-    |     |
| 1. <i>Xylaria grammica_c385_g9177</i>  | DARDLLG-FVDGTXNP-    |     |
| 2. <i>Kretzschmaria deusta</i>         | DARDLLG-FVDGTXNP-    |     |
| 3. <i>Streptomyces coelicolor</i>      | DERDMLG-FVDGTXNP-    |     |
| 4. Q0SE24                              | DSRDLLG-FVDGTXNP-    |     |
| 5. <i>Bacteroides thetaiotaomicron</i> | DGKAIIIG-FVDGTXNPA   |     |
| 6. <i>Shewanella oneidensis</i>        | DSRDLLG-FVDGTXNP-    |     |
| 7. <i>Pseudomonas putida</i>           | EERDLSG-FVDGTXNP-    |     |
| 8. <i>Pseudomonas putida</i>           | GGHDLTG-FVDGTXNP-    |     |
| 9. <i>Pseudomonas aeruginosa</i>       | EDRDLSG-FVDGTXNP-    |     |
| 10. <i>Xylaria grammica_c33_g1956</i>  | DGRVMGGRYVDHI SNP-   |     |
| 11. <i>Thermobifida fusca</i>          | TPRNLMLG-QIDGTXNP-   |     |
| 12. <i>Streptomyces coelicolor</i>     | TARNLMLG-QVDGTXNP-   |     |
| 13. <i>Streptomyces coelicolor</i>     | TPRNLMLG-FKDGTNRNI-  |     |
| 14. <i>Bacillus subtilis</i>           | TPRNLMLG-FKDGTGNQ-   |     |
| 15. <i>Escherichia coli</i>            | TPINLLG-FKDGTANP-    |     |
| 16. <i>Xylaria grammica_c6_g488</i>    | KGHEHFHFG-FNDGLSQPA  |     |
| 17. <i>Termitomyces albuminosus</i>    | FGHEHFHFG-YLDGINSNPL |     |
| 18. <i>Bjerkandera adusta</i>          | AGHEHFHFG-FLDGLSQPS  |     |
| 19. <i>Mycetinis scorodonius</i>       | QGHEHFHFG-FMDGLSNPA  |     |
| 20. <i>Mycena epipterygia</i>          | EGHEHFHFG-FLDGLSQPA  |     |
| 21. <i>Auricularia auricula-judae</i>  | AGHEMFHFG-FLDLIAQPA  |     |
| 22. <i>Pleurotus ostreatus</i>         | AGKEHFHFG-WLDGFIQPA  |     |
| 23. <i>Amycolatopsis sp</i>            | DGIEHFHFG-YVDGRSQPL  |     |
